CORRECTION

# Correction: Microbial Inactivation in the Liquid Phase Induced by Multigas Plasma Jet

Toshihiro Takamatsu, Kodai Uehara, Yota Sasaki, Miyahara Hidekazu, Yuriko Matsumura, Atsuo Iwasawa, Norihiko Ito, Masahiro Kohno, Takeshi Azuma, Akitoshi Okino

The images for Figs 1 and 3 are incorrectly switched. The image that appears as Fig 1 should be Fig 3, and the image that appears as Fig 3 should be Fig 1. The figure captions appear in the correct order. Please see the correct Figs 1 and 3 here.

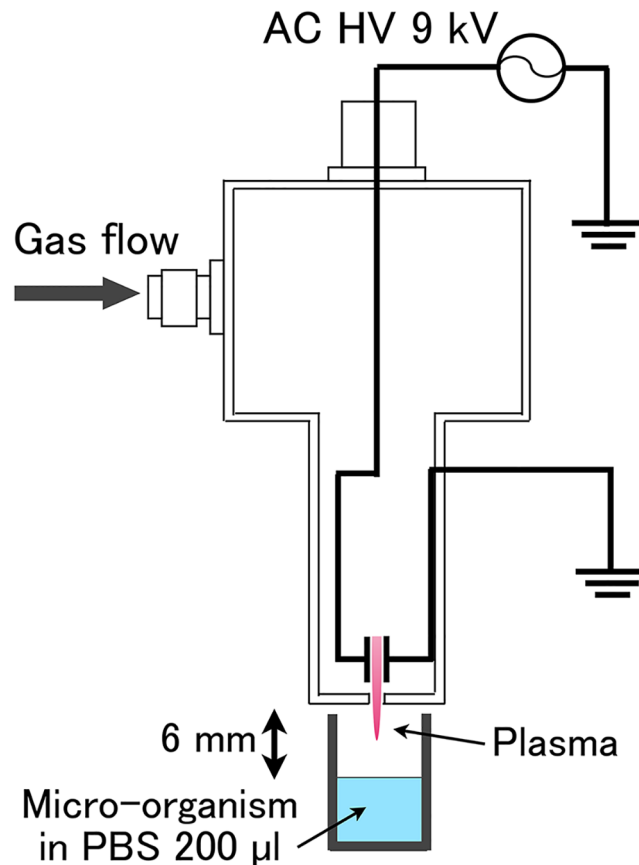

**Fig 1. A schematic of the plasma treatment system using a multigas plasma jet source.**

doi:10.1371/journal.pone.0135546.g001

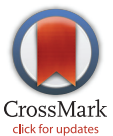

**OPEN ACCESS**

**Citation:** Takamatsu T, Uehara K, Sasaki Y, Hidekazu M, Matsumura Y, Iwasawa A, et al. (2015) Correction: Microbial Inactivation in the Liquid Phase Induced by Multigas Plasma Jet. PLoS ONE 10(8): e0135546. doi:10.1371/journal.pone.0135546

**Published:** August 7, 2015

**Copyright:** © 2015 Takamatsu et al. This is an open access article distributed under the terms of the [Creative Commons Attribution License](https://creativecommons.org/licenses/by/4.0/), which permits unrestricted use, distribution, and reproduction in any medium, provided the original author and source are credited.

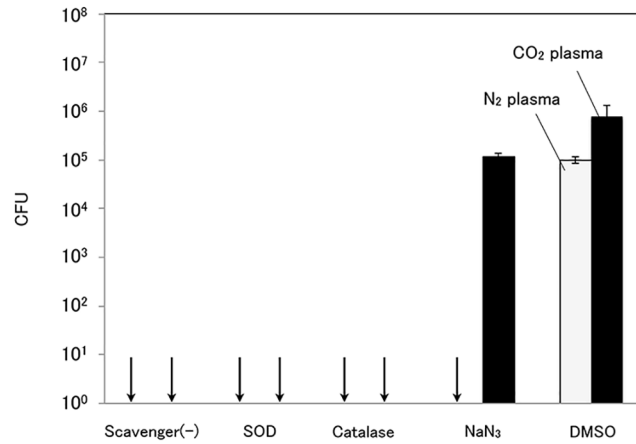

**Fig 3. Inactivation effects of nitrogen plasma and carbon dioxide plasma on *P. aeruginosa* suspension including each radical scavenger.** (Treatment time, 60 s; initial bacteria concentration,  $5.4 \times 10^7$  CFU). SOD was used as a superoxide scavenger, catalase as a  $H_2O_2$  scavenger,  $NaN_3$  as a singlet oxygen scavenger, and DMSO as an OH radical scavenger.

doi:10.1371/journal.pone.0135546.g002

## Reference

1. Takamatsu T, Uehara K, Sasaki Y, Hidekazu M, Matsumura Y, Iwasawa A, et al. (2015) Microbial Inactivation in the Liquid Phase Induced by Multigas Plasma Jet. PLoS ONE 10(7): e0132381. doi: [10.1371/journal.pone.0132381](https://doi.org/10.1371/journal.pone.0132381) PMID: [26173107](https://pubmed.ncbi.nlm.nih.gov/26173107/)
